# Supplementary material
Source: PubMed Central journal article supplement (PMC4853837)
Supplement: Supplementary_Material_787.pdf [file Supplementary_Material_787.pdf]

Supplemental Tables and Figures for:

**Extracellular  $\text{HCO}_3^-$  is sensed by mouse cerebral arteries: regulation of  
tone by receptor protein tyrosine phosphatase  $\gamma$**

Ebbe Boedtkjer<sup>1,2</sup>, Kristoffer B. Hansen<sup>1</sup>, Donna M. B. Boedtkjer<sup>1,2</sup>, Christian Aalkjaer<sup>1</sup>  
and Walter F. Boron<sup>2</sup>

<sup>1</sup>Department of Biomedicine, Aarhus University, Aarhus, Denmark

<sup>2</sup>Department of Physiology and Biophysics, Case Western Reserve University, Cleveland, Ohio,  
USA

| Part 1      | 1<br>pH 7.40<br>22 mM $HCO_3^-$<br>5% $CO_2$ | 2<br>pH 7.10<br>11 mM $HCO_3^-$<br>5% $CO_2$ | 3<br>pH 7.10<br>22 mM $HCO_3^-$<br>10% $CO_2$ | 4 OOE<br>pH 7.40<br>22 mM $HCO_3^-$<br>2.5% $CO_2$ |      |       | 5 OOE<br>pH 7.40<br>22 mM $HCO_3^-$<br>10% $CO_2$ |      |       | 6 OOE<br>pH 7.40<br>11 mM $HCO_3^-$<br>5% $CO_2$ |      |       |
|-------------|----------------------------------------------|----------------------------------------------|-----------------------------------------------|----------------------------------------------------|------|-------|---------------------------------------------------|------|-------|--------------------------------------------------|------|-------|
|             |                                              |                                              |                                               | 4a                                                 | 4b   | 4Mix* | 5a                                                | 5b   | 5Mix* | 6a                                               | 6b   | 6Mix* |
| NaCl        | 101                                          | 112                                          | 101                                           | 113                                                | 91   | 102   | 113                                               | 91   | 102   | 135                                              | 91   | 113   |
| KCl         | 5                                            | 5                                            | 5                                             | 10                                                 | 0    | 5     | 10                                                | 0    | 5     | 10                                               | 0    | 5     |
| $NaH_2PO_4$ | 2                                            | 2                                            | 2                                             | 0                                                  | 4    | 2     | 0                                                 | 4    | 2     | 0                                                | 4    | 2     |
| $CaCl_2$    | 1.6                                          | 1.6                                          | 1.6                                           | 0                                                  | 3.2  | 1.6   | 3.2                                               | 0    | 1.6   | 3.2                                              | 0    | 1.6   |
| $MgSO_4$    | 1.2                                          | 1.2                                          | 1.2                                           | 0                                                  | 2.4  | 1.2   | 0                                                 | 2.4  | 1.2   | 0                                                | 2.4  | 1.2   |
| Glucose     | 5.5                                          | 5.5                                          | 5.5                                           | 0                                                  | 11   | 5.5   | 0                                                 | 11   | 5.5   | 0                                                | 11   | 5.5   |
| $CO_2$ (%)  | 5                                            | 5                                            | 10                                            | 5                                                  | 0    | 2.5   | 20                                                | 0    | 10    | 10                                               | 0    | 5     |
| $NaHCO_3$   | 22                                           | 11                                           | 22                                            | 44                                                 | 0    | 22    | 44                                                | 0    | 22    | 22                                               | 0    | 11    |
| HEPES       | 32.5                                         | 32.5                                         | 32.5                                          | 0                                                  | 65   | 32.5  | 0                                                 | 65   | 32.5  | 0                                                | 65   | 32.5  |
| EDTA        | 0.03                                         | 0.03                                         | 0.03                                          | 0.03                                               | 0.03 | 0.03  | 0.03                                              | 0.03 | 0.03  | 0.03                                             | 0.03 | 0.03  |
| pH          | 7.40                                         | 7.10                                         | 7.10                                          | 7.70                                               | 7.34 | 7.40  | 7.10                                              | 7.46 | 7.40  | 7.10                                             | 7.43 | 7.40  |

**Supplemental Table 1 - Part 1. Compositions of three equilibrated and three out-of-equilibrium solutions.** Concentrations are in mM except for  $CO_2$ , where concentration is in % $CO_2$  in a gas cylinder. All solutions were aerated (with a gas mixture containing the indicated % $CO_2$ , balance air) and titrated with NaOH or HCl to the indicated pH at 37°C. For each OOE solution (e.g., “4”), we mix equilibrated solutions “a” and “b” (e.g., “4a” and “4b”) to produce the OOE solution.\*The columns named “Mix” represent the predicted instantaneous concentrations after mixing solutions “a” and “b”. The compositions of the mixed solutions change over time as the system moves closer towards equilibrium. However, due to the continuous flow conditions, concentrations at the site of the artery (located <100 ms from the point of mixing) will be virtually identical to the instantaneous concentrations.

| Part 2      | 7 OOE<br>pH 7.40<br>44 mM $HCO_3^-$<br>5% $CO_2$ |      |       | 8 OOE<br>pH 7.10<br>22 mM $HCO_3^-$<br>5% $CO_2$ |      |       | 9 OOE<br>pH 7.70<br>22 mM $HCO_3^-$<br>5% $CO_2$ |      |       | 10 OOE<br>pH 7.10<br>44 mM $HCO_3^-$<br>5% $CO_2$ |      |        | 11 OOE<br>pH 7.10<br>22 mM $HCO_3^-$<br>2.5% $CO_2$ |      |        |
|-------------|--------------------------------------------------|------|-------|--------------------------------------------------|------|-------|--------------------------------------------------|------|-------|---------------------------------------------------|------|--------|-----------------------------------------------------|------|--------|
|             | 7a                                               | 7b   | 7Mix* | 8a                                               | 8b   | 8Mix* | 9a                                               | 9b   | 9Mix* | 10a                                               | 10b  | 10Mix* | 11a                                                 | 11b  | 11Mix* |
| NaCl        | 69                                               | 91   | 80    | 113                                              | 91   | 102   | 113                                              | 91   | 102   | 69                                                | 91   | 80     | 113                                                 | 91   | 102    |
| KCl         | 10                                               | 0    | 5     | 10                                               | 0    | 5     | 10                                               | 0    | 5     | 10                                                | 0    | 5      | 10                                                  | 0    | 5      |
| $NaH_2PO_4$ | 0                                                | 4    | 2     | 0                                                | 4    | 2     | 0                                                | 4    | 2     | 0                                                 | 4    | 2      | 0                                                   | 4    | 2      |
| $CaCl_2$    | 0                                                | 3.2  | 1.6   | 0                                                | 3.2  | 1.6   | 3.2                                              | 0    | 1.6   | 0                                                 | 3.2  | 1.6    | 0                                                   | 3.2  | 1.6    |
| $MgSO_4$    | 0                                                | 2.4  | 1.2   | 0                                                | 2.4  | 1.2   | 0                                                | 2.4  | 1.2   | 0                                                 | 2.4  | 1.2    | 0                                                   | 2.4  | 1.2    |
| Glucose     | 0                                                | 11   | 5.5   | 0                                                | 11   | 5.5   | 0                                                | 11   | 5.5   | 0                                                 | 11   | 5.5    | 0                                                   | 11   | 5.5    |
| $CO_2$ (%)  | 10                                               | 0    | 5     | 10                                               | 0    | 5     | 10                                               | 0    | 5     | 10                                                | 0    | 5      | 5                                                   | 0    | 2.5    |
| $NaHCO_3$   | 88                                               | 0    | 44    | 44                                               | 0    | 22    | 44                                               | 0    | 22    | 88                                                | 0    | 44     | 44                                                  | 0    | 22     |
| HEPES       | 0                                                | 65   | 32.5  | 0                                                | 65   | 32.5  | 0                                                | 65   | 32.5  | 0                                                 | 65   | 32.5   | 0                                                   | 65   | 32.5   |
| EDTA        | 0.03                                             | 0.03 | 0.03  | 0.03                                             | 0.03 | 0.03  | 0.03                                             | 0.03 | 0.03  | 0.03                                              | 0.03 | 0.03   | 0.03                                                | 0.03 | 0.03   |
| pH          | 7.70                                             | 7.29 | 7.40  | 7.40                                             | 7.04 | 7.10  | 7.40                                             | 7.76 | 7.70  | 7.70                                              | 6.86 | 7.10   | 7.70                                                | 6.98 | 7.10   |

**Supplemental Table 1 - Part 2. Compositions of five additional out-of-equilibrium solutions.** See part 1 for details.

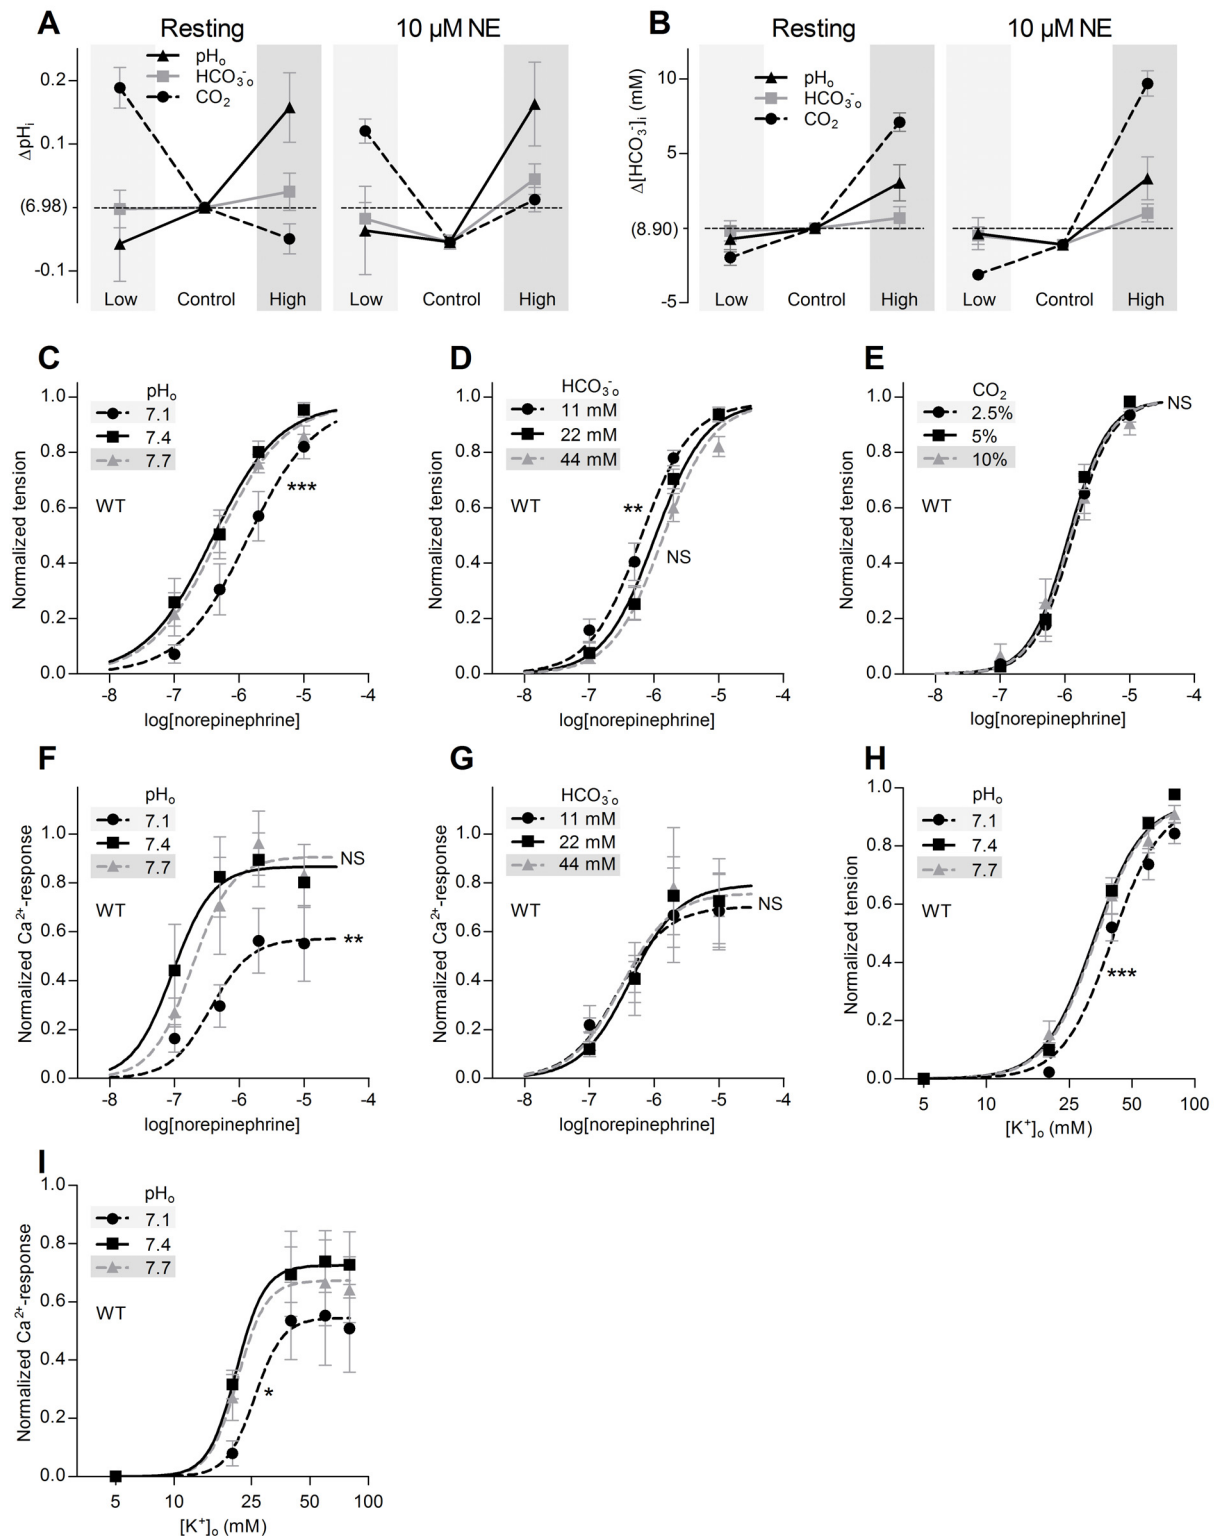

**Supplemental Figure 1.** Selective changes in pH<sub>o</sub> and to a smaller degree [HCO<sub>3</sub>]<sub>o</sub>—but not pCO<sub>2</sub>—directly modulate mesenteric artery tone under OOE conditions. **A.** Effects of selectively varying pH<sub>o</sub>, [HCO<sub>3</sub>]<sub>o</sub> or pCO<sub>2</sub> (maintaining other two at control levels) on VSMC pH<sub>i</sub> in resting

mesenteric arteries (left panel) or mesenteric arteries contracted by 10  $\mu$ M norepinephrine (NE, right panel). Under “Control” conditions,  $CO_2$  is 5%,  $pH_o$  7.4, and  $[HCO_3^-]_o$  22 mM. Compared to “Control”, “Low” refers to selective changes in  $CO_2$  to 2.5%,  $[HCO_3^-]_o$  to 11 mM or  $pH_o$  to 7.1. “High” refers to selective changes in  $CO_2$  to 10%,  $[HCO_3^-]_o$  to 44 mM or  $pH_o$  to 7.7. Arteries are from wild-type mice (n=5-9). **B.** Effects of selectively varying  $pH_o$ ,  $[HCO_3^-]_o$  or  $pCO_2$  (maintaining other two at control levels) on VSMC calculated  $[HCO_3^-]_i$  in resting mesenteric arteries (left panel) or mesenteric arteries contracted by 10  $\mu$ M norepinephrine (right panel). Arteries are from wild-type mice (n=5-9). **C-E.** Effects of selectively varying  $pH_o$ ,  $[HCO_3^-]_o$ , or  $pCO_2$  (maintaining other two at control levels) on norepinephrine-induced tension development in mesenteric arteries from wild-type mice (n=8 in panel C, n=14 in panel D and n=6 in panel E). **F-G.** Effects of selectively varying  $pH_o$  or  $[HCO_3^-]_o$  (maintaining unvaried parameters at control levels) on norepinephrine-induced VSMC  $Ca^{2+}$ -responses in mesenteric arteries from wild-type mice (n=6 for both panels). **H.** Effects of selective changes in  $pH_o$  ( $[HCO_3^-]_o$ =22 mM,  $CO_2$ =5%) on depolarization-induced tension development of mesenteric arteries from wild-type mice (n=11). We induce depolarization by raising  $[K^+]_o$  in the presence of 100 nM prazosin to inhibit post-synaptic  $\alpha_1$ -adrenergic effects of norepinephrine released from perivascular sympathetic nerves. **I.** Effects of selective changes in  $pH_o$  ( $[HCO_3^-]_o$ =22 mM,  $CO_2$ =5%) on depolarization-induced VSMC  $Ca^{2+}$ -responses in mesenteric arteries from wild-type mice (n=8). The curves in panel C through I are the result of least-squares fits to sigmoidal functions, and we compare them using extra sum-of-squares *F*-tests. \* $P$ <0.05, \*\* $P$ <0.01, \*\*\* $P$ <0.001, NS: not significantly different vs. control conditions ( $pH_o$ =7.4,  $[HCO_3^-]_o$ =22 mM,  $CO_2$ =5%).

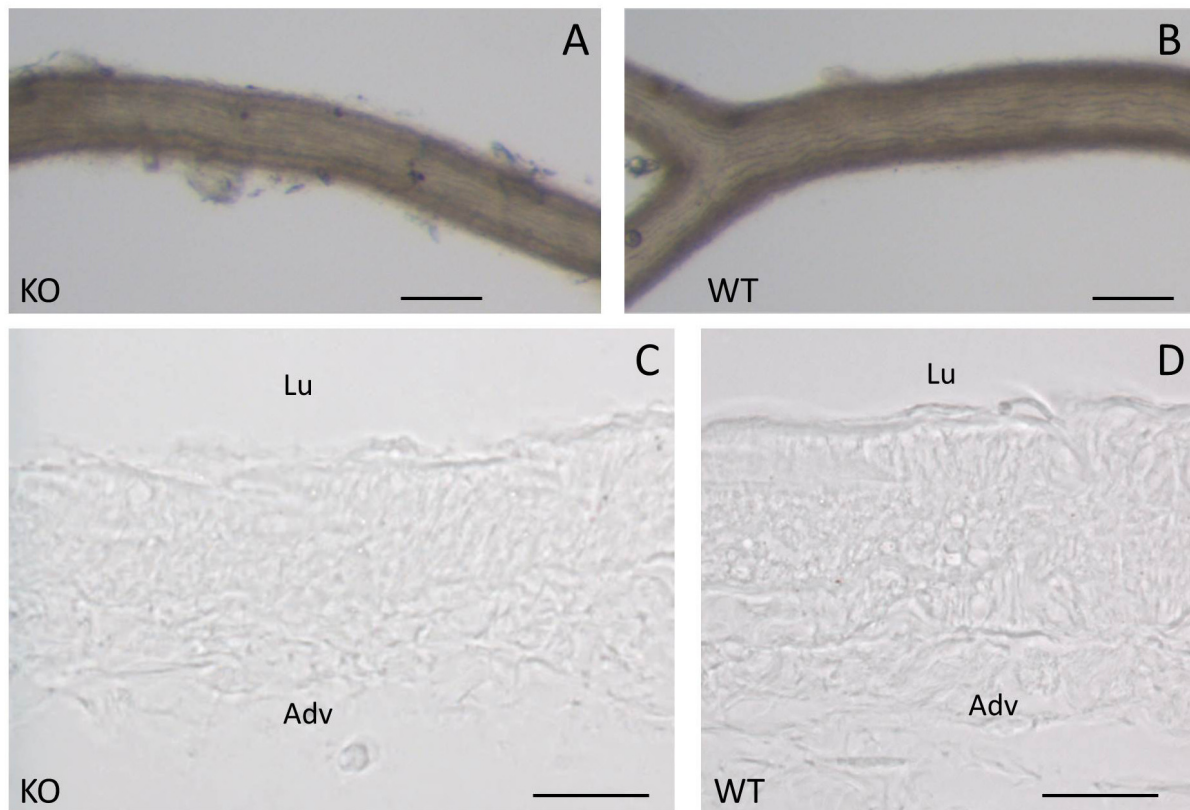

**Supplemental Figure 2.** *Ptpg* transcriptional activity is low in mesenteric arteries. **A-B.** Mesenteric arteries from an RPTP $\gamma$ -knockout (KO, panel A) and a wild-type (WT, panel B) mouse, stained histochemically for  $\beta$ -galactosidase activity. Each image is representative of 5 experiments. **C-D.** Histological sections (8  $\mu$ m thick) of mesenteric arteries from an RPTP $\gamma$ -knockout and a wild-type mouse, stained histochemically for  $\beta$ -galactosidase activity. Each image is representative of 3 experiments. The size bars in panel A and B represent 200  $\mu$ m; in panel C and D 20  $\mu$ m. “Lu” and “Adv” indicate lumen and adventitia, respectively.
